# Supplementary material for: SARSPLEX: Multiplex Serological ELISA with a Holistic Approach
Source: MDPI journal article supplement (doi:10.3390/v14122593), 2022-11-22
Supplement: s1 [file s1]

# SARSPLEX supplementary line data for each specimen evaluated in the clinical validation study

Tables S1, S2, and S3 present IgM, IgG, and IgA line data from SARSPLEX validation, respectively. The optical density values (ODI) in red, yellow, or green color represent positive, borderline, or negative immune responses, respectively.

**Table S1: List of samples selected for SARSPLEX IgM clinical validation.** Deidentified ID, as well as external previous diagnosis, are provided for all sample categories that include SARS-CoV-2 antibody positive ( $n=13$ ) and negative ( $n=52$ ), RT-PCR with disease onset  $< 19$  days ( $n=7$ ),  $> 19$  days ( $n=26$ ), and negative ( $n=2$ ), Human Parvovirus B19 positive ( $n=2$ ), pre-2019CoV ( $n=64$ ), and summer flu ( $n=36$ ). The total sample size for SARSPLEX IgM validation is  $n=202$ . Previous diagnosis refers to reference results from RT-PCR tests manufactured by Autoimmun Diagnostik GmbH and Mobidiag Oy or serology tests developed by Euroimmune, Ortho clinical diagnostics, Mindray, and more. IgM ODI refers to the IgM optical density index from SARSPLEX.

| Sample ID | Sample origin | Previous diagnosis | IgM ODI |
|-----------|---------------|--------------------|---------|
| COP2°     | Germany       | RT-PCR positive    | 1.647   |
| COP3°     | Germany       | RT-PCR positive    | 1.121   |
| COP4°     | Germany       | RT-PCR positive    | 0.867   |
| COP5°     | Germany       | RT-PCR positive    | 1.566   |
| COP6°     | Germany       | RT-PCR positive    | 3.254   |
| COP7°     | Germany       | RT-PCR negative    | 1.653   |
| COP8°     | Germany       | RT-PCR negative    | 0.682   |
| A184°     | Germany       | Pre-2019-CoV       | 0.572   |
| A185°     | Germany       | Pre-2019-CoV       | 0.861   |
| A187°     | Germany       | Pre-2019-CoV       | 0.867   |
| A189°     | Germany       | Pre-2019-CoV       | 0.572   |
| A193°     | Germany       | Pre-2019-CoV       | 0.671   |
| A194°     | Germany       | Pre-2019-CoV       | 0.613   |
| A226°     | Germany       | Pre-2019-CoV       | 0.919   |
| A237°     | Germany       | Pre-2019-CoV       | 0.931   |
| A246°     | Germany       | Pre-2019-CoV       | 0.994   |
| A265°     | Germany       | Pre-2019-CoV       | 0.838   |
| A267°     | Germany       | Pre-2019-CoV       | 0.694   |
| A276°     | Germany       | Pre-2019-CoV       | 0.711   |
| A292°     | Germany       | Pre-2019-CoV       | 0.555   |
| A293°     | Germany       | Pre-2019-CoV       | 0.353   |
| A298°     | Germany       | Pre-2019-CoV       | 0.503   |

|        |         |              |       |
|--------|---------|--------------|-------|
| A306°  | Germany | Pre-2019-CoV | 1.029 |
| A308°  | Germany | Pre-2019-CoV | 0.740 |
| A312°  | Germany | Pre-2019-CoV | 0.965 |
| A315°  | Germany | Pre-2019-CoV | 0.671 |
| A316°  | Germany | Pre-2019-CoV | 0.618 |
| A317°  | Germany | Pre-2019-CoV | 0.919 |
| A318°  | Germany | Pre-2019-CoV | 0.462 |
| A321°  | Germany | Pre-2019-CoV | 0.844 |
| A328°  | Germany | Pre-2019-CoV | 0.566 |
| A331°  | Germany | Pre-2019-CoV | 0.844 |
| A334°  | Germany | Pre-2019-CoV | 0.827 |
| A335°  | Germany | Pre-2019-CoV | 0.618 |
| A336°  | Germany | Pre-2019-CoV | 0.775 |
| A341°  | Germany | Pre-2019-CoV | 0.474 |
| A353°  | Germany | Pre-2019-CoV | 0.734 |
| A355°  | Germany | Pre-2019-CoV | 0.775 |
| A363°  | Germany | Pre-2019-CoV | 0.867 |
| A366°  | Germany | Pre-2019-CoV | 0.723 |
| A367°  | Germany | Pre-2019-CoV | 0.624 |
| A375°  | Germany | Pre-2019-CoV | 0.618 |
| A376°  | Germany | Pre-2019-CoV | 0.965 |
| UM79*  | Finland | Summer flu   | 0.879 |
| UM81*  | Finland | Summer flu   | 0.578 |
| UM82*  | Finland | Summer flu   | 0.896 |
| UM83*  | Finland | Summer flu   | 0.867 |
| UM84*  | Finland | Summer flu   | 0.844 |
| UM87*  | Finland | Summer flu   | 0.786 |
| UM88*  | Finland | Summer flu   | 0.659 |
| UM92*  | Finland | Summer flu   | 0.815 |
| UM96*  | Finland | Summer flu   | 0.775 |
| UM99*  | Finland | Summer flu   | 0.769 |
| UM100* | Finland | Summer flu   | 0.879 |
| UM102* | Finland | Summer flu   | 0.399 |
| UM103* | Finland | Summer flu   | 0.879 |
| UM106* | Finland | Summer flu   | 0.624 |
| UM107* | Finland | Summer flu   | 0.543 |
| UM109* | Finland | Summer flu   | 0.601 |
| UM111* | Finland | Summer flu   | 0.971 |
| UM112* | Finland | Summer flu   | 0.867 |
| UM114* | Finland | Summer flu   | 0.786 |
| UM115* | Finland | Summer flu   | 0.538 |
| UM117* | Finland | Summer flu   | 0.931 |

|        |         |                           |       |
|--------|---------|---------------------------|-------|
| UM120* | Finland | Summer flu                | 0.763 |
| UM121* | Finland | Summer flu                | 0.613 |
| UM122* | Finland | Summer flu                | 0.410 |
| UM123* | Finland | Summer flu                | 0.526 |
| UM124* | Finland | Summer flu                | 0.844 |
| UM125* | Finland | Summer flu                | 0.543 |
| UM126* | Finland | Summer flu                | 0.647 |
| UM131* | Finland | Summer flu                | 0.624 |
| UM132* | Finland | Summer flu                | 0.653 |
| UM133* | Finland | Summer flu                | 0.821 |
| UM134* | Finland | Summer flu                | 0.642 |
| UM135* | Finland | Summer flu                | 0.954 |
| UM139* | Finland | Summer flu                | 0.665 |
| UM141* | Finland | Summer flu                | 0.555 |
| UM145* | Finland | Summer flu                | 1.006 |
| 274*   | Spain   | QMLAB NEG & ELISA IgM NEG | 0.486 |
| 275*   | Spain   | ELISA IgM POS             | 1.104 |
| 2219*  | Spain   | QMLAB NEG & ELISA IgM NEG | 0.451 |
| 2233*  | Spain   | QMLAB NEG & ELISA IgM NEG | 0.717 |
| 4604*  | Spain   | QMLAB POS & ELISA IgM POS | 0.792 |
| 4612*  | Spain   | QMLAB NEG & ELISA IgM NEG | 0.751 |
| 4613*  | Spain   | QMLAB NEG & ELISA IgM NEG | 0.509 |
| 4614*  | Spain   | ELISA IgM NEG             | 0.434 |
| 4623*  | Spain   | QMLAB NEG & ELISA IgM NEG | 0.728 |
| 4626*  | Spain   | ELISA IgM NEG             | 0.676 |
| 4627*  | Spain   | ELISA IgM NEG             | 0.445 |
| 4630*  | Spain   | QMLAB POS & ELISA IgM POS | 0.873 |
| 4631*  | Spain   | QMLAB POS                 | 1.104 |
| 4632*  | Spain   | ELISA IgM NEG             | 0.705 |
| 4633*  | Spain   | QMLAB POS & ELISA IgM POS | 0.728 |
| 4634*  | Spain   | QMLAB NEG & ELISA IgM NEG | 0.486 |
| 4635*  | Spain   | ELISA IgM NEG             | 0.665 |
| 4637*  | Spain   | QMLAB NEG & ELISA IgM NEG | 0.364 |
| 4638*  | Spain   | ELISA IgM NEG             | 0.705 |
| 8243*  | Spain   | ELISA IgM NEG             | 0.416 |
| 8255*  | Spain   | QMLAB NEG                 | 0.590 |
| 23580* | Spain   | QMLAB NEG & ELISA IgM NEG | 0.653 |
| 23589* | Spain   | ELISA IgM NEG             | 0.751 |
| 23590* | Spain   | QMLAB POS                 | 1.110 |
| 23597* | Spain   | QMLAB NEG & ELISA IgM NEG | 0.699 |
| 10709* | Spain   | QMLAB NEG                 | 0.543 |
| 66799* | Spain   | QMLAB NEG & ELISA IgM NEG | 0.355 |

|        |        |                                                              |       |
|--------|--------|--------------------------------------------------------------|-------|
| 8219*  | Spain  | QMLAB NEG & ELISA IgM NEG                                    | 0.397 |
| 4701*  | Spain  | QMLAB NEG & ELISA IgM NEG                                    | 0.372 |
| 4650*  | Spain  | QMLAB NEG & ELISA IgM NEG                                    | 0.502 |
| 4642*  | Spain  | ELISA IgM NEG                                                | 0.550 |
| 4643*  | Spain  | QMLAB NEG & ELISA IgM NEG                                    | 0.426 |
| 4644*  | Spain  | ELISA IgM NEG                                                | 0.835 |
| 8190*  | Spain  | ELISA IgM NEG                                                | 0.751 |
| 8196*  | Spain  | QMLAB NEG & ELISA IgM NEG                                    | 0.491 |
| 8202*  | Spain  | ELISA IgM NEG                                                | 0.509 |
| 8203*  | Spain  | QMLAB POS                                                    | 1.118 |
| 8204*  | Spain  | ELISA IgM NEG                                                | 0.372 |
| 8206*  | Spain  | ELISA IgM NEG                                                | 0.308 |
| 8209*  | Spain  | ELISA IgM NEG                                                | 0.343 |
| 8210*  | Spain  | ELISA IgM NEG                                                | 0.408 |
| 8211*  | Spain  | ELISA IgM NEG                                                | 0.544 |
| 9064*  | Spain  | QMLAB NEG                                                    | 0.337 |
| 9065*  | Spain  | QMLAB NEG                                                    | 0.443 |
| 9076*  | Spain  | QMLAB NEG & ELISA IgM NEG                                    | 0.461 |
| 9078*  | Spain  | QMLAB NEG & ELISA IgM NEG                                    | 0.520 |
| 9080*  | Spain  | ELISA IgM NEG                                                | 0.486 |
| 23548* | Spain  | ELISA IgM NEG                                                | 0.621 |
| 23555* | Spain  | QMLAB NEG & ELISA IgM NEG                                    | 0.372 |
| 23556* | Spain  | QMLAB NEG & ELISA IgM NEG                                    | 0.313 |
| 23565* | Spain  | ELISA IgM NEG                                                | 0.420 |
| POS1*  | Sweden | RT-PCR Positive sample collected 16 days after disease onset | 0.589 |
| POS2*  | Sweden | RT-PCR Positive sample collected 15 days after disease onset | 1.152 |
| POS3*  | Sweden | RT-PCR Positive sample collected 16 days after disease onset | 0.675 |
| POS4*  | Sweden | RT-PCR Positive sample collected 16 days after disease onset | 0.506 |
| POS5*  | Sweden | RT-PCR Positive sample collected 16 days after disease onset | 0.476 |
| POS6*  | Sweden | RT-PCR Positive sample collected 15 days after disease onset | 0.382 |
| POS7*  | Sweden | RT-PCR Positive sample collected 15 days after disease onset | 2.624 |
| POS8*  | Sweden | RT-PCR Positive sample collected 25 days after disease onset | 0.389 |
| POS9*  | Sweden | RT-PCR Positive sample collected 22 days after disease onset | 4.010 |

|             |        |                                                              |        |
|-------------|--------|--------------------------------------------------------------|--------|
| POS10*      | Sweden | RT-PCR Positive sample collected 19 days after disease onset | 2.401  |
| POS11*      | Sweden | RT-PCR Positive sample                                       | 2.829  |
| POS12*      | Sweden | RT-PCR Positive sample collected 25 days after disease onset | 0.479  |
| POS13*      | Sweden | RT-PCR Positive sample collected 33 days after disease onset | 0.445  |
| POS14*      | Sweden | RT-PCR Positive sample collected 30 days after disease onset | 0.557  |
| POS15*      | Sweden | RT-PCR Positive sample collected 24 days after disease onset | 1.203  |
| POS16*      | Sweden | RT-PCR Positive sample collected 26 days after disease onset | 1.046  |
| POS17*      | Sweden | RT-PCR Positive sample collected 32 days after disease onset | 6.784  |
| POS18*      | Sweden | RT-PCR Positive sample collected 26 days after disease onset | 1.250  |
| POS19*      | Sweden | RT-PCR Positive sample collected 26 days after disease onset | 7.461  |
| POS20*      | Sweden | RT-PCR Positive sample                                       | 7.342  |
| POS21*      | Sweden | RT-PCR Positive sample collected 33 days after disease onset | 1.357  |
| POS22*      | Sweden | RT-PCR Positive sample                                       | 4.991  |
| POS23*      | Sweden | RT-PCR Positive sample collected 21 days after disease onset | 3.399  |
| POS24*      | Sweden | RT-PCR Positive sample collected 22 days after disease onset | 1.271  |
| POS25*      | Sweden | RT-PCR Positive sample collected 49 days after disease onset | 19.670 |
| POS26*      | Sweden | RT-PCR Positive sample collected 23 days after disease onset | 1.134  |
| POS27*      | Sweden | RT-PCR Positive sample collected 58 days after disease onset | 1.730  |
| POS28*      | Sweden | RT-PCR Positive sample collected 67 days after disease onset | 0.719  |
| BRH1433663* | Sweden | Pre-2019-CoV                                                 | 0.366  |
| BRH1422641* | Sweden | Pre-2019-CoV                                                 | 0.404  |
| BRH1181285* | Sweden | Pre-2019-CoV                                                 | 0.431  |
| BRH1181287* | Sweden | Pre-2019-CoV                                                 | 0.410  |
| BRH1628895* | Sweden | Pre-2019-CoV                                                 | 0.399  |
| BRH1628903* | Sweden | Pre-2019-CoV                                                 | 0.545  |
| BRH1628904* | Sweden | Pre-2019-CoV                                                 | 0.379  |
| BRH1628909* | Sweden | Pre-2019-CoV                                                 | 0.382  |

|                   |         |                      |       |
|-------------------|---------|----------------------|-------|
| BRH1628916*       | Sweden  | Pre-2019-CoV         | 0.415 |
| BRH1628925*       | Sweden  | Pre-2019-CoV         | 0.325 |
| BRH1628936*       | Sweden  | Pre-2019-CoV         | 0.357 |
| BRH1628941*       | Sweden  | Pre-2019-CoV         | 0.512 |
| HMN28941*         | Sweden  | Pre-2019-CoV         | 0.557 |
| BRH1422669*       | Sweden  | Pre-2019-CoV         | 0.879 |
| BRH1422674*       | Sweden  | Pre-2019-CoV         | 0.703 |
| BRH1433675*       | Sweden  | Pre-2019-CoV         | 0.811 |
| BRH1433696*       | Sweden  | Pre-2019-CoV         | 1.324 |
| BRH1433655*       | Sweden  | Pre-2019-CoV         | 0.429 |
| BRH1433656*       | Sweden  | Pre-2019-CoV         | 0.615 |
| BRH1433665*       | Sweden  | Pre-2019-CoV         | 0.962 |
| BRH1422632*       | Sweden  | Pre-2019-CoV         | 6.196 |
| BRH1422642*       | Sweden  | Pre-2019-CoV         | 2.399 |
| BRH1422651*       | Sweden  | Pre-2019-CoV         | 0.739 |
| BRH1422654*       | Sweden  | Pre-2019-CoV         | 0.738 |
| BRH1422656*       | Sweden  | Pre-2019-CoV         | 0.987 |
| BRH1422668*       | Sweden  | Pre-2019-CoV         | 1.140 |
| Linköping NS1*    | Sweden  | Pre-2019-CoV         | 1.094 |
| Linköping NS2*    | Sweden  | Pre-2019-CoV         | 1.623 |
| 2°                | Russia  | Mindray IgM POS      | 1.000 |
| 4°                | Russia  | Mindray IgM POS      | 2.913 |
| 5°                | Russia  | Mindray IgM POS      | 1.422 |
| 8°                | Russia  | Mindray IgM POS      | 1.445 |
| 10°               | Russia  | Mindray IgM POS      | 1.162 |
| 19°               | Russia  | Mindray IgM POS      | 1.098 |
| 20°               | Russia  | Mindray IgM NEG      | 0.647 |
| 21°               | Russia  | Mindray IgM NEG      | 0.832 |
| 22°               | Russia  | Mindray IgM NEG      | 0.520 |
| 23°               | Russia  | Mindray IgM NEG      | 0.780 |
| 25°               | Russia  | Mindray IgM NEG      | 0.491 |
| 26°               | Russia  | Mindray IgM NEG      | 0.971 |
| 27°               | Russia  | Mindray IgM NEG      | 0.832 |
| 28°               | Russia  | Mindray IgM NEG      | 0.601 |
| DLS0087200 (202)* | Finland | Human Parvovirus B19 | 0.532 |
| DLS0077499 (203)* | Finland | Human Parvovirus B19 | 0.717 |

\*Serum was collected using clot activator serum tubes or SST II Advance tubes

°Plasma was collected using a Lithium Heparin tube.

POS = Positive clinical outcome

NEG = Negative clinical outcome

**Table S2: List of samples selected for SARSPLEX IgG clinical validation.** Deidentified ID, as well as external previous diagnosis, are provided for all sample categories that include SARS-CoV-2 antibody positive ( $n=67$ ) and negative ( $n=78$ ), RT-PCR with disease onset  $< 19$  days ( $n=7$ ),  $> 19$  days ( $n=26$ ), and negative ( $n=2$ ), Human Parvovirus B19 positive ( $n=2$ ), pre-2019CoV ( $n=102$ ), and summer flu ( $n=44$ ). The total sample size for SARSPLEX IgG validation is  $n=328$ . Previous diagnosis refers to reference results from RT-PCR tests manufactured by Autoimmun Diagnostik GmbH and Mobidiag Oy or serology tests developed by Euroimmune, Ortho clinical diagnostics, Mindray, and more. IgG ODI refers to the IgG optical density index from SARSPLEX.

| Sample ID | Sample origin | Previous diagnosis       | IgG ODI |
|-----------|---------------|--------------------------|---------|
| COP1°     | Germany       | IgG weak positive        | 1.204   |
| COP2°     | Germany       | IgG positive & RTPCR POS | 1.164   |
| COP3°     | Germany       | IgG positive & RTPCR POS | 1.788   |
| COP4°     | Germany       | IgG positive & RTPCR POS | 2.617   |
| COP5°     | Germany       | IgG positive & RTPCR POS | 2.920   |
| COP6°     | Germany       | IgG negative & RTPCR POS | 1.407   |
| COP7°     | Germany       | IgG negative & RTPCR NEG | 0.864   |
| COP8°     | Germany       | IgG negative & RTPCR NEG | 0.317   |
| COP9°     | Germany       | IgG positive             | 1.556   |
| COP10°    | Germany       | IgG positive             | 2.920   |
| COP11°    | Germany       | IgG negative             | 1.034   |
| COP12°    | Germany       | IgG positive             | 1.738   |
| COP13°    | Germany       | IgG positive             | 2.757   |
| COP14°    | Germany       | IgG negative             | 0.395   |
| COP15°    | Germany       | IgG negative             | 0.622   |
| COP16°    | Germany       | IgG negative             | 0.348   |
| COP17°    | Germany       | IgG positive             | 0.343   |
| COP115*   | Germany       | IgG positive             | 1.061   |
| COP116*   | Germany       | IgG negative             | 0.395   |
| COP117*   | Germany       | IgG negative             | 0.707   |
| COP118*   | Germany       | IgG negative             | 0.291   |
| COP119*   | Germany       | IgG negative             | 0.563   |
| COP120*   | Germany       | IgG negative             | 0.305   |
| COP121*   | Germany       | IgG negative             | 0.385   |
| COP122*   | Germany       | IgG negative             | 0.376   |
| COP123*   | Germany       | IgG negative             | 0.559   |
| COP124*   | Germany       | IgG negative             | 0.879   |
| COP125*   | Germany       | IgG negative             | 0.378   |
| COP126*   | Germany       | IgG negative             | 0.330   |
| COP127*   | Germany       | IgG negative             | 0.596   |
| COP128*   | Germany       | IgG negative             | 0.244   |

|         |         |              |       |
|---------|---------|--------------|-------|
| COP129* | Germany | IgG negative | 0.450 |
| COP130* | Germany | IgG negative | 0.347 |
| COP131* | Germany | IgG negative | 0.524 |
| COP132* | Germany | IgG negative | 0.495 |
| COP133* | Germany | IgG negative | 0.170 |
| COP134* | Germany | IgG negative | 0.679 |
| COP135* | Germany | IgG negative | 0.467 |
| COP136* | Germany | IgG negative | 0.184 |
| COP137* | Germany | IgG negative | 0.298 |
| COP138* | Germany | IgG negative | 0.509 |
| COP139* | Germany | IgG negative | 0.316 |
| COP140* | Germany | IgG negative | 0.287 |
| COP141* | Germany | IgG negative | 0.259 |
| COP142* | Germany | IgG negative | 1.129 |
| A4°     | Germany | Pre-2019-CoV | 0.637 |
| A5°     | Germany | Pre-2019-CoV | 0.724 |
| A82°    | Germany | Pre-2019-CoV | 0.555 |
| A83°    | Germany | Pre-2019-CoV | 0.741 |
| A84°    | Germany | Pre-2019-CoV | 0.562 |
| A87°    | Germany | Pre-2019-CoV | 0.814 |
| A91°    | Germany | Pre-2019-CoV | 0.843 |
| A93°    | Germany | Pre-2019-CoV | 0.895 |
| A94°    | Germany | Pre-2019-CoV | 0.402 |
| A97°    | Germany | Pre-2019-CoV | 0.874 |
| A99°    | Germany | Pre-2019-CoV | 0.788 |
| A100°   | Germany | Pre-2019-CoV | 0.655 |
| A103°   | Germany | Pre-2019-CoV | 0.261 |
| A107°   | Germany | Pre-2019-CoV | 0.223 |
| A108°   | Germany | Pre-2019-CoV | 0.207 |
| A112°   | Germany | Pre-2019-CoV | 1.007 |
| A114°   | Germany | Pre-2019-CoV | 0.307 |
| A115°   | Germany | Pre-2019-CoV | 0.496 |
| A116°   | Germany | Pre-2019-CoV | 0.482 |
| A117°   | Germany | Pre-2019-CoV | 0.418 |
| A118°   | Germany | Pre-2019-CoV | 0.571 |
| A119°   | Germany | Pre-2019-CoV | 0.847 |
| A120°   | Germany | Pre-2019-CoV | 0.506 |
| A122°   | Germany | Pre-2019-CoV | 0.323 |
| A123°   | Germany | Pre-2019-CoV | 0.646 |
| A125°   | Germany | Pre-2019-CoV | 0.328 |



|       |         |              |       |
|-------|---------|--------------|-------|
| A126° | Germany | Pre-2019-CoV | 0.414 |
| A129° | Germany | Pre-2019-CoV | 0.385 |
| A130° | Germany | Pre-2019-CoV | 0.611 |
| A131° | Germany | Pre-2019-CoV | 0.490 |
| A133° | Germany | Pre-2019-CoV | 0.521 |
| A134° | Germany | Pre-2019-CoV | 0.560 |
| A135° | Germany | Pre-2019-CoV | 0.324 |
| A154° | Germany | Pre-2019-CoV | 0.636 |
| A182° | Germany | Pre-2019-CoV | 0.360 |
| A184° | Germany | Pre-2019-CoV | 0.568 |
| A185° | Germany | Pre-2019-CoV | 0.518 |
| A187° | Germany | Pre-2019-CoV | 0.473 |
| A189° | Germany | Pre-2019-CoV | 0.307 |
| A192° | Germany | Pre-2019-CoV | 0.315 |
| A193° | Germany | Pre-2019-CoV | 0.272 |
| A194° | Germany | Pre-2019-CoV | 0.625 |
| A226° | Germany | Pre-2019-CoV | 0.704 |
| A237° | Germany | Pre-2019-CoV | 0.338 |
| A246° | Germany | Pre-2019-CoV | 0.642 |
| A252° | Germany | Pre-2019-CoV | 0.415 |
| A265° | Germany | Pre-2019-CoV | 0.411 |
| A267° | Germany | Pre-2019-CoV | 0.534 |
| A276° | Germany | Pre-2019-CoV | 0.420 |
| A292° | Germany | Pre-2019-CoV | 0.396 |
| A293° | Germany | Pre-2019-CoV | 0.697 |
| A298° | Germany | Pre-2019-CoV | 0.441 |
| A306° | Germany | Pre-2019-CoV | 0.607 |
| A308° | Germany | Pre-2019-CoV | 0.318 |
| A312° | Germany | Pre-2019-CoV | 0.324 |
| A315° | Germany | Pre-2019-CoV | 0.277 |
| A316° | Germany | Pre-2019-CoV | 0.542 |
| A318° | Germany | Pre-2019-CoV | 0.385 |
| A321° | Germany | Pre-2019-CoV | 0.897 |
| A325° | Germany | Pre-2019-CoV | 0.447 |
| A328° | Germany | Pre-2019-CoV | 0.539 |
| A331° | Germany | Pre-2019-CoV | 0.690 |
| A334° | Germany | Pre-2019-CoV | 0.478 |
| A335° | Germany | Pre-2019-CoV | 0.564 |
| A336° | Germany | Pre-2019-CoV | 0.774 |
| A341° | Germany | Pre-2019-CoV | 0.236 |

|        |         |              |       |
|--------|---------|--------------|-------|
| A344°  | Germany | Pre-2019-CoV | 0.401 |
| A353°  | Germany | Pre-2019-CoV | 0.091 |
| A355°  | Germany | Pre-2019-CoV | 0.350 |
| A363°  | Germany | Pre-2019-CoV | 0.236 |
| A366°  | Germany | Pre-2019-CoV | 0.614 |
| A367°  | Germany | Pre-2019-CoV | 0.509 |
| A375°  | Germany | Pre-2019-CoV | 0.358 |
| A376°  | Germany | Pre-2019-CoV | 0.267 |
| UM79*  | Finland | Summer flu   | 0.469 |
| UM81*  | Finland | Summer flu   | 0.322 |
| UM82*  | Finland | Summer flu   | 0.634 |
| UM83*  | Finland | Summer flu   | 0.614 |
| UM84*  | Finland | Summer flu   | 0.430 |
| UM86*  | Finland | Summer flu   | 0.393 |
| UM87*  | Finland | Summer flu   | 0.525 |
| UM88*  | Finland | Summer flu   | 0.552 |
| UM92*  | Finland | Summer flu   | 0.626 |
| UM93*  | Finland | Summer flu   | 0.647 |
| UM95*  | Finland | Summer flu   | 0.525 |
| UM96*  | Finland | Summer flu   | 0.871 |
| UM97*  | Finland | Summer flu   | 0.696 |
| UM100* | Finland | Summer flu   | 0.713 |
| UM101* | Finland | Summer flu   | 0.966 |
| UM102* | Finland | Summer flu   | 0.520 |
| UM103* | Finland | Summer flu   | 0.446 |
| UM104* | Finland | Summer flu   | 0.318 |
| UM105* | Finland | Summer flu   | 0.668 |
| UM106* | Finland | Summer flu   | 0.687 |
| UM107* | Finland | Summer flu   | 0.622 |
| UM108* | Finland | Summer flu   | 0.591 |
| UM109* | Finland | Summer flu   | 0.213 |
| UM111* | Finland | Summer flu   | 0.643 |
| UM112* | Finland | Summer flu   | 0.709 |
| UM114* | Finland | Summer flu   | 0.409 |
| UM115* | Finland | Summer flu   | 0.647 |
| UM117* | Finland | Summer flu   | 1.018 |
| UM121* | Finland | Summer flu   | 0.623 |
| UM122* | Finland | Summer flu   | 0.519 |
| UM123* | Finland | Summer flu   | 0.569 |
| UM124* | Finland | Summer flu   | 0.269 |

|        |         |                                                                                |       |
|--------|---------|--------------------------------------------------------------------------------|-------|
| UM125* | Finland | Summer flu                                                                     | 0.253 |
| UM126* | Finland | Summer flu                                                                     | 0.645 |
| UM128* | Finland | Summer flu                                                                     | 0.467 |
| UM131* | Finland | Summer flu                                                                     | 0.764 |
| UM132* | Finland | Summer flu                                                                     | 0.278 |
| UM133* | Finland | Summer flu                                                                     | 0.434 |
| UM134* | Finland | Summer flu                                                                     | 0.277 |
| UM135* | Finland | Summer flu                                                                     | 0.641 |
| UM138* | Finland | Summer flu                                                                     | 0.380 |
| UM139* | Finland | Summer flu                                                                     | 0.813 |
| UM141* | Finland | Summer flu                                                                     | 0.805 |
| UM145* | Finland | Summer flu                                                                     | 0.253 |
| POS1*  | Sweden  | RT-PCR Positive sample collected 16 days after disease onset and ELISA IgG NEG | 0.316 |
| POS2*  | Sweden  | RT-PCR Positive sample collected 15 days after disease onset and ELISA IgG NEG | 0.676 |
| POS3*  | Sweden  | RT-PCR Positive sample collected 16 days after disease onset and ELISA IgG NEG | 0.929 |
| POS4*  | Sweden  | RT-PCR Positive sample collected 16 days after disease onset and ELISA IgG NEG | 0.949 |
| POS5*  | Sweden  | RT-PCR Positive sample collected 16 days after disease onset and ELISA IgG NEG | 0.348 |
| POS6*  | Sweden  | RT-PCR Positive sample collected 15 days after disease onset and ELISA IgG NEG | 0.652 |
| POS7*  | Sweden  | RT-PCR Positive sample collected 15 days after disease onset and ELISA IgG NEG | 0.308 |
| POS8*  | Sweden  | RT-PCR Positive sample collected 25 days after disease onset and ELISA IgG POS | 0.246 |
| POS9*  | Sweden  | RT-PCR Positive sample collected 22 days after disease onset and ELISA IgG POS | 2.920 |

|        |        |                                                                                |       |
|--------|--------|--------------------------------------------------------------------------------|-------|
| POS10* | Sweden | RT-PCR Positive sample collected 19 days after disease onset and ELISA IgG POS | 0.156 |
| POS11* | Sweden | RT-PCR Positive sample and ELISA IgG POS                                       | 0.239 |
| POS12* | Sweden | RT-PCR Positive sample collected 25 days after disease onset and ELISA IgG POS | 1.931 |
| POS13* | Sweden | RT-PCR Positive sample collected 33 days after disease onset and ELISA IgG NEG | 0.723 |
| POS14* | Sweden | RT-PCR Positive sample collected 30 days after disease onset and ELISA IgG NEG | 0.675 |
| POS15* | Sweden | RT-PCR Positive sample collected 24 days after disease onset and ELISA IgG NEG | 1.212 |
| POS16* | Sweden | RT-PCR Positive sample collected 26 days after disease onset and ELISA IgG NEG | 0.445 |
| POS17* | Sweden | RT-PCR Positive sample collected 32 days after disease onset and ELISA IgG POS | 2.920 |
| POS18* | Sweden | RT-PCR Positive sample collected 26 days after disease onset and ELISA IgG NEG | 0.710 |
| POS19* | Sweden | RT-PCR Positive sample collected 26 days after disease onset and ELISA IgG POS | 2.920 |
| POS20* | Sweden | RT-PCR Positive sample and ELISA IgG POS                                       | 2.920 |
| POS21* | Sweden | RT-PCR Positive sample collected 33 days after disease onset and ELISA IgG POS | 2.920 |
| POS22* | Sweden | RT-PCR Positive sample and ELISA IgG POS                                       | 2.920 |
| POS23* | Sweden | RT-PCR Positive sample collected 21 days after disease onset and ELISA IgG POS | 2.411 |

|             |        |                                                                                |       |
|-------------|--------|--------------------------------------------------------------------------------|-------|
| POS24*      | Sweden | RT-PCR Positive sample collected 22 days after disease onset and ELISA IgG POS | 2.920 |
| POS25*      | Sweden | RT-PCR Positive sample collected 49 days after disease onset and ELISA IgG POS | 2.920 |
| POS26*      | Sweden | RT-PCR Positive sample collected 23 days after disease onset and ELISA IgG POS | 2.746 |
| POS27*      | Sweden | RT-PCR Positive sample collected 58 days after disease onset and ELISA IgG POS | 2.792 |
| POS28*      | Sweden | RT-PCR Positive sample collected 67 days after disease onset and ELISA IgG POS | 2.566 |
| BRH1433663* | Sweden | Pre-2019-CoV                                                                   | 0.351 |
| BRH1422641* | Sweden | Pre-2019-CoV                                                                   | 0.761 |
| BRH1181285* | Sweden | Pre-2019-CoV                                                                   | 0.232 |
| BRH1181287* | Sweden | Pre-2019-CoV                                                                   | 0.244 |
| BRH1628895* | Sweden | Pre-2019-CoV                                                                   | 0.272 |
| BRH1628903* | Sweden | Pre-2019-CoV                                                                   | 0.291 |
| BRH1628904* | Sweden | Pre-2019-CoV                                                                   | 2.104 |
| BRH1628909* | Sweden | Pre-2019-CoV                                                                   | 1.552 |
| BRH1628916* | Sweden | Pre-2019-CoV                                                                   | 1.264 |
| BRH1628925* | Sweden | Pre-2019-CoV                                                                   | 0.399 |
| BRH1628936* | Sweden | Pre-2019-CoV                                                                   | 0.395 |
| BRH1628941* | Sweden | Pre-2019-CoV                                                                   | 0.301 |
| HMN28941*   | Sweden | Pre-2019-CoV                                                                   | 0.308 |
| BRH1422669* | Sweden | Pre-2019-CoV                                                                   | 0.251 |
| BRH1422674* | Sweden | Pre-2019-CoV                                                                   | 0.583 |
| BRH1433675* | Sweden | Pre-2019-CoV                                                                   | 0.537 |
| BRH1433696* | Sweden | Pre-2019-CoV                                                                   | 1.508 |
| BRH1433655* | Sweden | Pre-2019-CoV                                                                   | 0.742 |
| BRH1433656* | Sweden | Pre-2019-CoV                                                                   | 0.696 |
| BRH1433665* | Sweden | Pre-2019-CoV                                                                   | 1.405 |
| BRH1422632* | Sweden | Pre-2019-CoV                                                                   | 1.527 |
| BRH1422642* | Sweden | Pre-2019-CoV                                                                   | 0.800 |
| BRH1422651* | Sweden | Pre-2019-CoV                                                                   | 1.243 |
| BRH1422654* | Sweden | Pre-2019-CoV                                                                   | 1.829 |
| BRH1422656* | Sweden | Pre-2019-CoV                                                                   | 0.854 |
| BRH1422668* | Sweden | Pre-2019-CoV                                                                   | 0.739 |

|                |        |                         |       |
|----------------|--------|-------------------------|-------|
| Linköping NS1* | Sweden | Pre-2019-CoV            | 0.897 |
| Linköping NS2* | Sweden | Pre-2019-CoV            | 1.895 |
| 271*           | Spain  | QMLAB POS & QML IgG POS | 3.104 |
| 274*           | Spain  | QMLAB NEG & QML IgG NEG | 0.796 |
| 275*           | Spain  | QMLAB NEG & QML IgG NEG | 0.737 |
| 2219*          | Spain  | QMLAB NEG & QML IgG NEG | 0.514 |
| 4604*          | Spain  | QMLAB POS & QML IgG POS | 3.346 |
| 4612*          | Spain  | QMLAB NEG & QML IgG NEG | 0.591 |
| 4613*          | Spain  | QMLAB NEG & QML IgG NEG | 0.749 |
| 4614*          | Spain  | QMLAB POS & QML IgG POS | 2.708 |
| 4623*          | Spain  | QMLAB NEG & QML IgG NEG | 0.266 |
| 4626*          | Spain  | QMLAB POS & QML IgG POS | 2.016 |
| 4627*          | Spain  | QMLAB POS & QML IgG POS | 2.336 |
| 4631*          | Spain  | QMLAB POS & QML IgG POS | 3.196 |
| 4632*          | Spain  | QMLAB POS & QML IgG POS | 2.431 |
| 4633*          | Spain  | QMLAB POS & QML IgG POS | 3.181 |
| 4634*          | Spain  | QMLAB NEG & QML IgG NEG | 0.429 |
| 4635*          | Spain  | QMLAB POS & QML IgG POS | 2.859 |
| 4637*          | Spain  | QMLAB NEG & QML IgG NEG | 0.610 |
| 4638*          | Spain  | QMLAB POS & QML IgG POS | 0.539 |
| 8243*          | Spain  | QMLAB NEG & QML IgG NEG | 0.755 |
| 8255*          | Spain  | QMLAB NEG & QML IgG NEG | 0.515 |
| 23580*         | Spain  | QMLAB NEG & QML IgG NEG | 0.305 |
| 10709*         | Spain  | QMLAB NEG & QML IgG NEG | 0.525 |
| 66799*         | Spain  | QMLAB NEG & QML IgG NEG | 0.801 |
| 8219*          | Spain  | QMLAB NEG & QML IgG NEG | 1.054 |
| 4701*          | Spain  | QMLAB NEG & QML IgG NEG | 0.487 |
| 4650*          | Spain  | QMLAB NEG & QML IgG NEG | 0.653 |
| 4643*          | Spain  | QMLAB NEG               | 0.180 |
| 4644*          | Spain  | QMLAB POS & QML IgG POS | 1.273 |
| 8196*          | Spain  | QMLAB NEG               | 0.335 |
| 8202*          | Spain  | QMLAB POS & QML IgG POS | 2.717 |
| 8203*          | Spain  | QMLAB POS & QML IgG POS | 2.306 |
| 8204*          | Spain  | QML IgG NEG             | 0.517 |
| 8205*          | Spain  | QMLAB POS & QML IgG POS | 2.805 |
| 8206*          | Spain  | QMLAB POS & QML IgG POS | 2.706 |
| 8209*          | Spain  | QMLAB NEG & QML IgG NEG | 0.661 |
| 8210*          | Spain  | QMLAB NEG & QML IgG NEG | 0.451 |
| 8211*          | Spain  | QMLAB POS & QML IgG POS | 2.351 |
| 9063*          | Spain  | QMLAB POS & QML IgG POS | 1.037 |

|                   |         |                         |       |
|-------------------|---------|-------------------------|-------|
| 9064*             | Spain   | QMLAB NEG & QML IgG NEG | 0.344 |
| 9065*             | Spain   | QMLAB NEG & QML IgG NEG | 0.291 |
| 9076*             | Spain   | QMLAB NEG & QML IgG NEG | 0.343 |
| 9078*             | Spain   | QMLAB NEG & QML IgG NEG | 0.243 |
| 9080*             | Spain   | QMLAB POS               | 1.860 |
| 23548*            | Spain   | QMLAB POS               | 1.001 |
| 23555*            | Spain   | QMLAB NEG & QML IgG NEG | 0.292 |
| 23556*            | Spain   | QMLAB NEG & QML IgG NEG | 0.395 |
| 23565*            | Spain   | QMLAB POS               | 1.000 |
| 1°                | Russia  | Mindray IgG POS         | 2.555 |
| 2°                | Russia  | Mindray IgG POS         | 2.190 |
| 3°                | Russia  | Mindray IgG POS         | 2.555 |
| 4°                | Russia  | Mindray IgG POS         | 2.555 |
| 5°                | Russia  | Mindray IgG POS         | 2.555 |
| 6°                | Russia  | Mindray IgG POS         | 2.555 |
| 7°                | Russia  | Mindray IgG POS         | 2.190 |
| 8°                | Russia  | Mindray IgG POS         | 2.482 |
| 9°                | Russia  | Mindray IgG POS         | 2.190 |
| 10°               | Russia  | Mindray IgG POS         | 2.628 |
| 12°               | Russia  | Mindray IgG NEG         | 0.971 |
| 13°               | Russia  | Mindray IgG NEG         | 0.382 |
| 14°               | Russia  | Mindray IgG NEG         | 0.534 |
| 16°               | Russia  | Mindray IgG NEG         | 0.909 |
| 18°               | Russia  | Mindray IgG NEG         | 0.682 |
| 19°               | Russia  | Mindray IgG NEG         | 1.818 |
| 20°               | Russia  | Mindray IgG POS         | 2.482 |
| 21°               | Russia  | Mindray IgG POS         | 1.297 |
| 22°               | Russia  | Mindray IgG POS         | 1.700 |
| 23°               | Russia  | Mindray IgG POS         | 2.426 |
| 24°               | Russia  | Mindray IgG POS         | 2.115 |
| 25°               | Russia  | Mindray IgG POS         | 1.977 |
| 26°               | Russia  | Mindray IgG POS         | 2.555 |
| 27°               | Russia  | Mindray IgG POS         | 2.219 |
| 28°               | Russia  | Mindray IgG POS         | 1.101 |
| DLS0087200 (202)* | Finland | Human Parvovirus B19    | 0.980 |
| DLS0077499 (203)* | Finland | Human Parvovirus B19    | 2.920 |

\*Serum was collected using clot activator serum tubes or SST II Advance tubes

°Plasma was collected using a Lithium Heparin tube.

POS = Positive clinical outcome

NEG = Negative clinical outcome

**Table S3: List of samples selected for SARSPLEX IgA clinical validation.** Deidentified ID, as well as external previous diagnosis, are provided for all sample categories that include SARS-CoV-2 antibody positive ( $n=23$ ) and negative ( $n=22$ ), RT-PCR with disease onset  $< 19$  days ( $n=7$ ),  $> 19$  days ( $n=26$ ), and negative ( $n=2$ ), Human Parvovirus B19 positive ( $n=2$ ), pre-2019CoV ( $n=39$ ), and summer flu ( $n=25$ ). The total sample size for SARSPLEX IgA validation is  $n=146$ . Previous diagnosis refers to reference results from RT-PCR tests manufactured by Autoimmun Diagnostik GmbH and Mobidiag Oy or serology tests developed by Euroimmune, Ortho clinical diagnostics, Mindray and more. IgA ODI refers to the IgA optical density index from SARSPLEX.

| Sample ID | Sample origin | Previous diagnosis       | IgA ODI |
|-----------|---------------|--------------------------|---------|
| COP1°     | Germany       | IgA positive             | 0.585   |
| COP2°     | Germany       | IgA positive & RTPCR POS | 1.799   |
| COP3°     | Germany       | IgA positive & RTPCR POS | 1.095   |
| COP4°     | Germany       | IgA positive & RTPCR POS | 7.843   |
| COP5°     | Germany       | IgA positive & RTPCR POS | 1.495   |
| COP6°     | Germany       | IgA positive & RTPCR POS | 1.242   |
| COP7°     | Germany       | IgA positive & RTPCR NEG | 1.085   |
| COP8°     | Germany       | IgA negative & RTPCR NEG | 0.544   |
| COP9°     | Germany       | IgA positive             | 0.665   |
| COP10°    | Germany       | IgA positive             | 5.747   |
| COP11°    | Germany       | IgA positive             | 10.294  |
| COP12°    | Germany       | IgA positive             | 1.376   |
| COP13°    | Germany       | IgA positive             | 8.438   |
| COP14°    | Germany       | IgA positive             | 1.119   |
| COP15°    | Germany       | IgA positive             | 0.928   |
| COP16°    | Germany       | IgA negative             | 0.567   |
| COP17°    | Germany       | IgA positive             | 0.881   |
| COP115*   | Germany       | IgA positive             | 1.359   |
| COP116*   | Germany       | IgA positive             | 0.628   |
| COP117*   | Germany       | IgA negative             | 0.572   |
| COP118*   | Germany       | IgA negative             | 0.422   |
| COP119*   | Germany       | IgA negative             | 0.642   |
| COP120*   | Germany       | IgA negative             | 0.553   |
| COP121*   | Germany       | IgA negative             | 0.408   |
| COP122*   | Germany       | IgA positive             | 0.619   |
| COP123*   | Germany       | IgA negative             | 0.427   |
| COP124*   | Germany       | IgA negative             | 2.283   |
| COP125*   | Germany       | IgA negative             | 0.394   |
| COP126*   | Germany       | IgA negative             | 0.633   |
| COP127*   | Germany       | IgA positive             | 0.741   |
| COP128*   | Germany       | IgA negative             | 0.708   |
| COP129*   | Germany       | IgA negative             | 0.666   |



|         |         |                |       |
|---------|---------|----------------|-------|
| COP130* | Germany | IgA negative   | 0.558 |
| COP131* | Germany | IgA negative   | 0.464 |
| COP132* | Germany | IgA negative   | 0.563 |
| COP133* | Germany | IgA negative   | 0.572 |
| COP134* | Germany | IgA positive   | 0.647 |
| COP135* | Germany | IgA negative   | 0.558 |
| COP136* | Germany | IgA negative   | 0.600 |
| COP137* | Germany | IgA negative   | 0.497 |
| COP138* | Germany | IgA borderline | 1.777 |
| COP139* | Germany | IgA negative   | 0.774 |
| COP140* | Germany | IgA negative   | 0.403 |
| COP141* | Germany | IgA positive   | 0.999 |
| COP142* | Germany | IgA positive   | 4.613 |
| A4°     | Germany | Pre-2019-CoV   | 0.951 |
| A84°    | Germany | Pre-2019-CoV   | 0.856 |
| A91°    | Germany | Pre-2019-CoV   | 0.607 |
| A94°    | Germany | Pre-2019-CoV   | 0.146 |
| A103°   | Germany | Pre-2019-CoV   | 0.739 |
| A107°   | Germany | Pre-2019-CoV   | 0.875 |
| A112°   | Germany | Pre-2019-CoV   | 0.939 |
| A116°   | Germany | Pre-2019-CoV   | 0.819 |
| A117°   | Germany | Pre-2019-CoV   | 0.658 |
| A129°   | Germany | Pre-2019-CoV   | 0.870 |
| A187°   | Germany | Pre-2019-CoV   | 0.707 |
| A192°   | Germany | Pre-2019-CoV   | 0.656 |
| A193°   | Germany | Pre-2019-CoV   | 0.934 |
| A265°   | Germany | Pre-2019-CoV   | 0.719 |
| A276°   | Germany | Pre-2019-CoV   | 0.868 |
| A292°   | Germany | Pre-2019-CoV   | 0.702 |
| A298°   | Germany | Pre-2019-CoV   | 0.685 |
| A335°   | Germany | Pre-2019-CoV   | 0.956 |
| A341°   | Germany | Pre-2019-CoV   | 0.402 |
| A355°   | Germany | Pre-2019-CoV   | 0.422 |
| A363°   | Germany | Pre-2019-CoV   | 0.451 |
| A376°   | Germany | Pre-2019-CoV   | 0.639 |
| UM79*   | Finland | Summer flu     | 0.753 |
| UM82*   | Finland | Summer flu     | 0.778 |
| UM83*   | Finland | Summer flu     | 0.968 |
| UM84*   | Finland | Summer flu     | 0.585 |
| UM86*   | Finland | Summer flu     | 0.653 |
| UM93*   | Finland | Summer flu     | 0.797 |
| UM99*   | Finland | Summer flu     | 0.909 |

|        |         |                                                              |       |
|--------|---------|--------------------------------------------------------------|-------|
| UM103* | Finland | Summer flu                                                   | 0.895 |
| UM106* | Finland | Summer flu                                                   | 0.885 |
| UM107* | Finland | Summer flu                                                   | 0.580 |
| UM114* | Finland | Summer flu                                                   | 0.861 |
| UM115* | Finland | Summer flu                                                   | 0.914 |
| UM120* | Finland | Summer flu                                                   | 0.688 |
| UM121* | Finland | Summer flu                                                   | 0.661 |
| UM122* | Finland | Summer flu                                                   | 0.549 |
| UM124* | Finland | Summer flu                                                   | 0.332 |
| UM125* | Finland | Summer flu                                                   | 0.414 |
| UM126* | Finland | Summer flu                                                   | 0.697 |
| UM130* | Finland | Summer flu                                                   | 0.878 |
| UM132* | Finland | Summer flu                                                   | 0.763 |
| UM133* | Finland | Summer flu                                                   | 0.663 |
| UM134* | Finland | Summer flu                                                   | 0.814 |
| UM135* | Finland | Summer flu                                                   | 0.746 |
| UM139* | Finland | Summer flu                                                   | 0.770 |
| UM145* | Finland | Summer flu                                                   | 0.690 |
| POS1*  | Sweden  | RT-PCR Positive sample collected 16 days after disease onset | 0.764 |
| POS2*  | Sweden  | RT-PCR Positive sample collected 15 days after disease onset | 0.870 |
| POS3*  | Sweden  | RT-PCR Positive sample collected 16 days after disease onset | 3.043 |
| POS4*  | Sweden  | RT-PCR Positive sample collected 16 days after disease onset | 0.678 |
| POS5*  | Sweden  | RT-PCR Positive sample collected 16 days after disease onset | 0.540 |
| POS6*  | Sweden  | RT-PCR Positive sample collected 15 days after disease onset | 0.541 |
| POS7*  | Sweden  | RT-PCR Positive sample collected 15 days after disease onset | 0.754 |
| POS8*  | Sweden  | RT-PCR Positive sample collected 25 days after disease onset | 0.504 |
| POS9*  | Sweden  | RT-PCR Positive sample collected 22 days after disease onset | 3.501 |
| POS10* | Sweden  | RT-PCR Positive sample collected 19 days after disease onset | 1.824 |
| POS11* | Sweden  | RT-PCR Positive sample                                       | 0.695 |
| POS12* | Sweden  | RT-PCR Positive sample collected 25 days after disease onset | 0.577 |

|             |        |                                                              |        |
|-------------|--------|--------------------------------------------------------------|--------|
| POS13*      | Sweden | RT-PCR Positive sample collected 33 days after disease onset | 5.003  |
| POS14*      | Sweden | RT-PCR Positive sample collected 30 days after disease onset | 0.737  |
| POS15*      | Sweden | RT-PCR Positive sample collected 24 days after disease onset | 1.007  |
| POS16*      | Sweden | RT-PCR Positive sample collected 26 days after disease onset | 0.830  |
| POS17*      | Sweden | RT-PCR Positive sample collected 32 days after disease onset | 20.619 |
| POS18*      | Sweden | RT-PCR Positive sample collected 26 days after disease onset | 1.114  |
| POS19*      | Sweden | RT-PCR Positive sample collected 26 days after disease onset | 8.903  |
| POS20*      | Sweden | RT-PCR Positive sample                                       | 20.619 |
| POS21*      | Sweden | RT-PCR Positive sample collected 33 days after disease onset | 2.380  |
| POS22*      | Sweden | RT-PCR Positive sample                                       | 4.158  |
| POS23*      | Sweden | RT-PCR Positive sample collected 21 days after disease onset | 3.536  |
| POS24*      | Sweden | RT-PCR Positive sample collected 22 days after disease onset | 2.639  |
| POS25*      | Sweden | RT-PCR Positive sample collected 49 days after disease onset | 6.770  |
| POS26*      | Sweden | RT-PCR Positive sample collected 23 days after disease onset | 1.588  |
| POS27*      | Sweden | RT-PCR Positive sample collected 58 days after disease onset | 5.002  |
| POS28*      | Sweden | RT-PCR Positive sample collected 67 days after disease onset | 1.793  |
| BRH1433663* | Sweden | Pre-2019-CoV                                                 | 0.705  |
| BRH1422641* | Sweden | Pre-2019-CoV                                                 | 0.990  |
| BRH1181285* | Sweden | Pre-2019-CoV                                                 | 0.527  |
| BRH1181287* | Sweden | Pre-2019-CoV                                                 | 0.529  |
| BRH1628895* | Sweden | Pre-2019-CoV                                                 | 0.508  |
| BRH1628903* | Sweden | Pre-2019-CoV                                                 | 0.522  |
| BRH1628916* | Sweden | Pre-2019-CoV                                                 | 0.746  |
| BRH1628925* | Sweden | Pre-2019-CoV                                                 | 0.539  |
| BRH1628936* | Sweden | Pre-2019-CoV                                                 | 0.497  |
| BRH1628941* | Sweden | Pre-2019-CoV                                                 | 0.455  |
| HMN28941*   | Sweden | Pre-2019-CoV                                                 | 0.558  |
| BRH1422669* | Sweden | Pre-2019-CoV                                                 | 0.516  |

|                   |         |                      |       |
|-------------------|---------|----------------------|-------|
| BRH1422674*       | Sweden  | Pre-2019-CoV         | 0.858 |
| BRH1433675*       | Sweden  | Pre-2019-CoV         | 1.053 |
| BRH1433656*       | Sweden  | Pre-2019-CoV         | 1.466 |
| BRH1433665*       | Sweden  | Pre-2019-CoV         | 1.074 |
| Linköping NS1*    | Sweden  | Pre-2019-CoV         | 1.246 |
| DLS0087200 (202)* | Finland | Human Parvovirus B19 | 8.351 |
| DLS0077499 (203)* | Finland | Human Parvovirus B19 | 8.351 |

\*Serum was collected using clot activator serum tubes or SST II Advance tubes

°Plasma was collected using Lithium Heparin tube.

POS = Positive clinical outcome

NEG = Negative clinical outcome

**Table S4: Identification of 23 asymptomatic COVID-19 RT-PCR-positive Sanoviv Medical Institute employees.** Green negative, red positive, yellow borderline. Diagnosis compared to RT-PCR results.

|        |               | SARSPLEX IgM<br>optical density index<br>(ODI) | DIAGNOSIS       |
|--------|---------------|------------------------------------------------|-----------------|
| ID     | Sample origin |                                                |                 |
| SMI2   | Sanoviv       | 0,246                                          | RT-PCR Positive |
| SMI15  | Sanoviv       | 1,22                                           | RT-PCR Positive |
| SMI18  | Sanoviv       | 0,793                                          | RT-PCR Positive |
| SMI27  | Sanoviv       | 1,839                                          | RT-PCR Positive |
| SMI33  | Sanoviv       | 2,405                                          | RT-PCR Positive |
| SMI39  | Sanoviv       | 0,902                                          | RT-PCR Positive |
| SMI41  | Sanoviv       | 0,738                                          | RT-PCR Positive |
| SMI48  | Sanoviv       | 0,908                                          | RT-PCR Positive |
| SMI51  | Sanoviv       | 0,688                                          | RT-PCR Positive |
| SMI63  | Sanoviv       | 0,892                                          | RT-PCR Positive |
| SMI84  | Sanoviv       | 0,929                                          | RT-PCR Positive |
| SMI89  | Sanoviv       | 0,919                                          | RT-PCR Positive |
| SMI102 | Sanoviv       | 0,918                                          | RT-PCR Positive |
| SMI110 | Sanoviv       | 1,882                                          | RT-PCR Negative |
| SMI110 | Sanoviv       | 0,559                                          | RT-PCR Positive |
| SMI114 | Sanoviv       | 0,892                                          | RT-PCR Positive |

  

|        |               | SARSPLEX IgG<br>optical density index<br>(ODI) | DIAGNOSIS       |
|--------|---------------|------------------------------------------------|-----------------|
| ID     | Sample origin |                                                |                 |
| SMI2   | Sanoviv       | 1,209                                          | RT-PCR Positive |
| SMI15  | Sanoviv       | 1,115                                          | RT-PCR Positive |
| SMI18  | Sanoviv       | 0,527                                          | RT-PCR Positive |
| SMI27  | Sanoviv       | 0,593                                          | RT-PCR Positive |
| SMI33  | Sanoviv       | 0,682                                          | RT-PCR Positive |
| SMI39  | Sanoviv       | 0,428                                          | RT-PCR Positive |
| SMI41  | Sanoviv       | 0,691                                          | RT-PCR Positive |
| SMI48  | Sanoviv       | 0,065                                          | RT-PCR Positive |
| SMI51  | Sanoviv       | 0,748                                          | RT-PCR Positive |
| SMI63  | Sanoviv       | 0,692                                          | RT-PCR Positive |
| SMI84  | Sanoviv       | 1,138                                          | RT-PCR Positive |
| SMI89  | Sanoviv       | 0,662                                          | RT-PCR Positive |
| SMI102 | Sanoviv       | 0,792                                          | RT-PCR Positive |
| SMI110 | Sanoviv       | 1,502                                          | RT-PCR Negative |
| SMI110 | Sanoviv       | 2,393                                          | RT-PCR Positive |
| SMI114 | Sanoviv       | 0,682                                          | RT-PCR Positive |

  

|        |               | SARSPLEX IgA<br>optical density index<br>(ODI) | DIAGNOSIS       |
|--------|---------------|------------------------------------------------|-----------------|
| ID     | Sample origin |                                                |                 |
| SMI2   | Sanoviv       | 1,109                                          | RT-PCR Positive |
| SMI15  | Sanoviv       | 1,102                                          | RT-PCR Positive |
| SMI18  | Sanoviv       | 1,682                                          | RT-PCR Positive |
| SMI27  | Sanoviv       | 2,485                                          | RT-PCR Positive |
| SMI33  | Sanoviv       | 1,862                                          | RT-PCR Positive |
| SMI39  | Sanoviv       | 2,637                                          | RT-PCR Positive |
| SMI41  | Sanoviv       | 1,206                                          | RT-PCR Positive |
| SMI48  | Sanoviv       | 0,955                                          | RT-PCR Positive |
| SMI51  | Sanoviv       | 1,834                                          | RT-PCR Positive |
| SMI63  | Sanoviv       | 1,957                                          | RT-PCR Positive |
| SMI84  | Sanoviv       | 1,395                                          | RT-PCR Positive |
| SMI89  | Sanoviv       | 1,763                                          | RT-PCR Positive |
| SMI102 | Sanoviv       | 2,379                                          | RT-PCR Positive |
| SMI110 | Sanoviv       | 3,204                                          | RT-PCR Negative |
| SMI110 | Sanoviv       | 1,844                                          | RT-PCR Positive |
| SMI114 | Sanoviv       | 2,379                                          | RT-PCR Positive |
